# Supplementary material
Source: Springer Nature journal article supplement (https://www.springermedizin.de/resource/supplementary/12891_2012_1657_MOESM2_ESM.pdf/9509086)

T-SHS

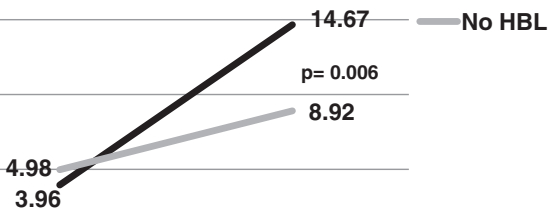

ES

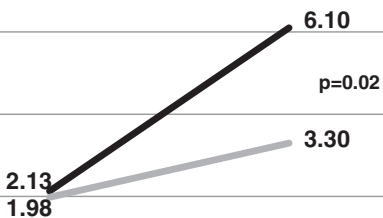

JSNS

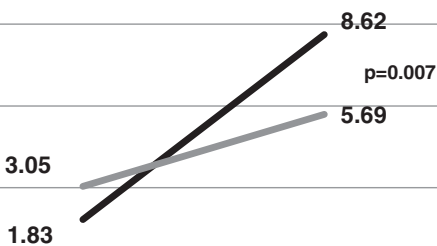

Baseline

24 months

Supplement: MOESM2 [file 9509086]
